# Supplementary material for: The achaete–scute complex contains a single gene that controls bristle development in the semi-aquatic bugs
Source: PubMed Central journal article supplement (PMC6283939; doi:10.1098/rspb.2018.2387), 2018-11-28
Supplement: rspb20182387supp1.pdf [file rspb20182387supp1.pdf]

**Supplementary figures and tables for :**

The *achaete-scute* complex contains a single gene that controls bristle development in the semi-aquatic bugs

**Authors:**

Cédric Finet<sup>1</sup>, Amélie Decaras<sup>1</sup>, David Armisen<sup>1</sup>, Abderrahman Khila<sup>1</sup>

**Affiliations:**

<sup>1</sup>: Institut de Génomique Fonctionnelle de Lyon, CNRS UMR 5242, Ecole Normale Supérieure de Lyon, Université Claude Bernard Lyon 1, 46 allée d'Italie, 69364 Lyon, France.

**Corresponding authors:**

[abderrahman.khila@ens-lyon.fr](mailto:abderrahman.khila@ens-lyon.fr); [cedric.finet@ens-lyon.org](mailto:cedric.finet@ens-lyon.org)

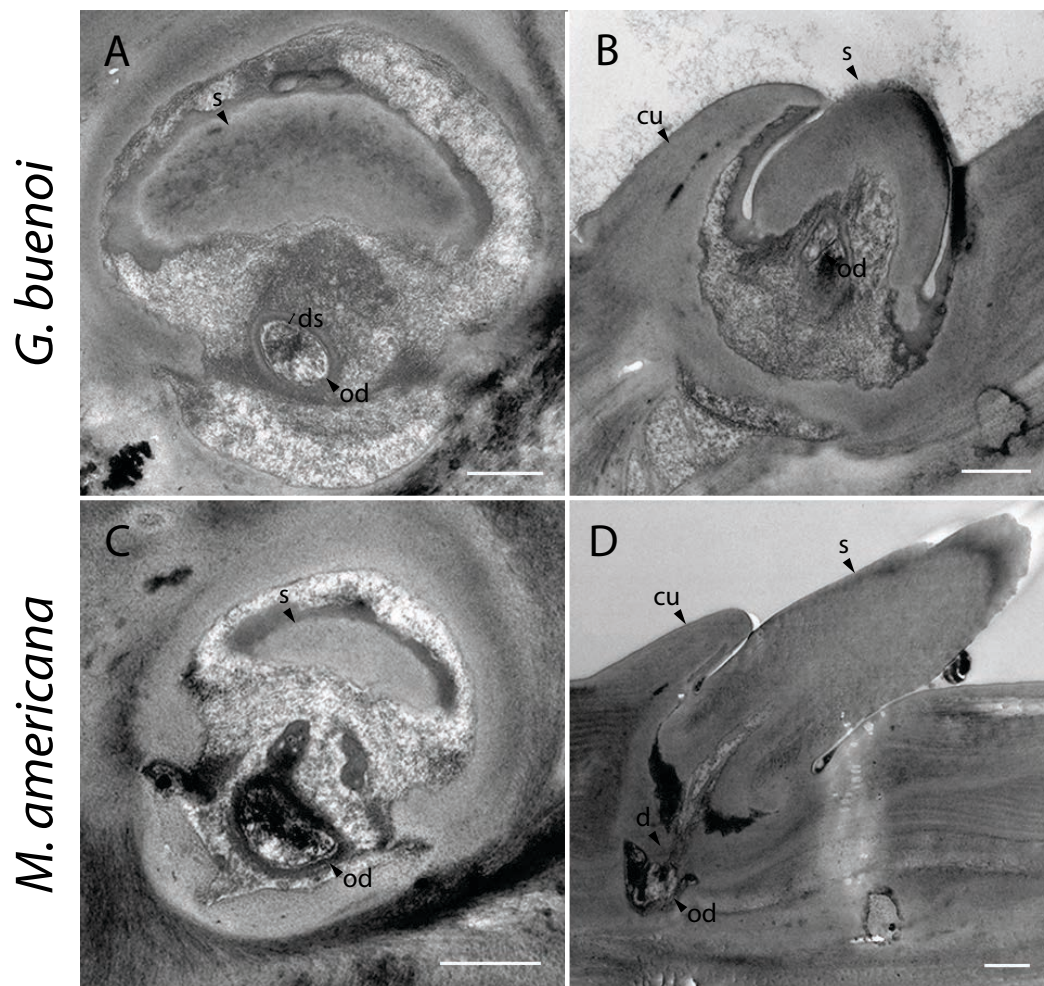

**Figure S1.** Ultrastructure of leg bristles in *G. buenoi* and *M. americana*. The TEM clichés show the presence of an outer dendritic segment underneath leg bristle in both *G. buenoi* (A, B) and *M. americana* (C, D). cu: cuticle, ds: dendritic sheath, oe: outer dendritic segment, s: shaft.

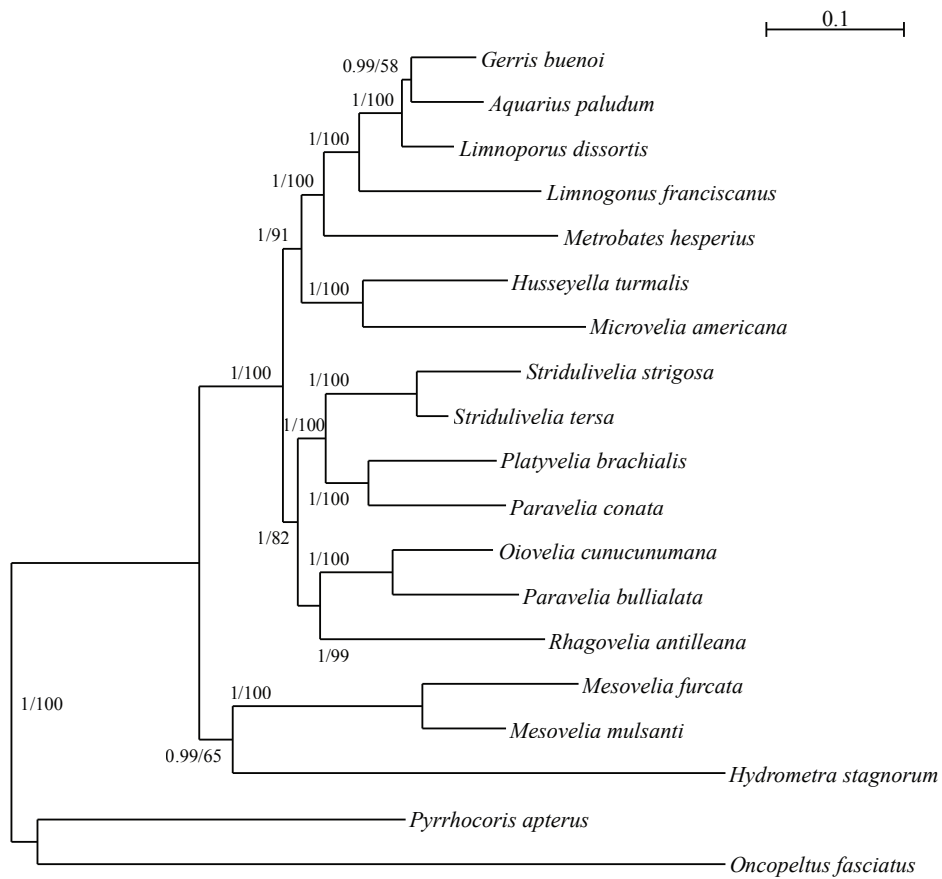

**Figure S2.** Phylograms of the Gerromorpha phylogeny built upon 14 markers. Support values obtained after 100 bootstrap replicates and Bayesian posterior probabilities are shown for all branches.

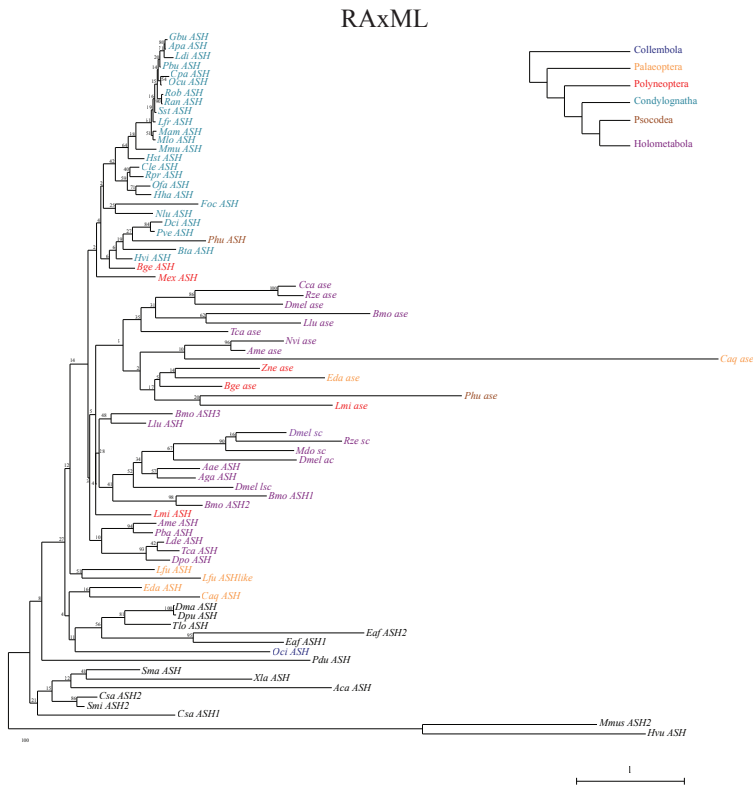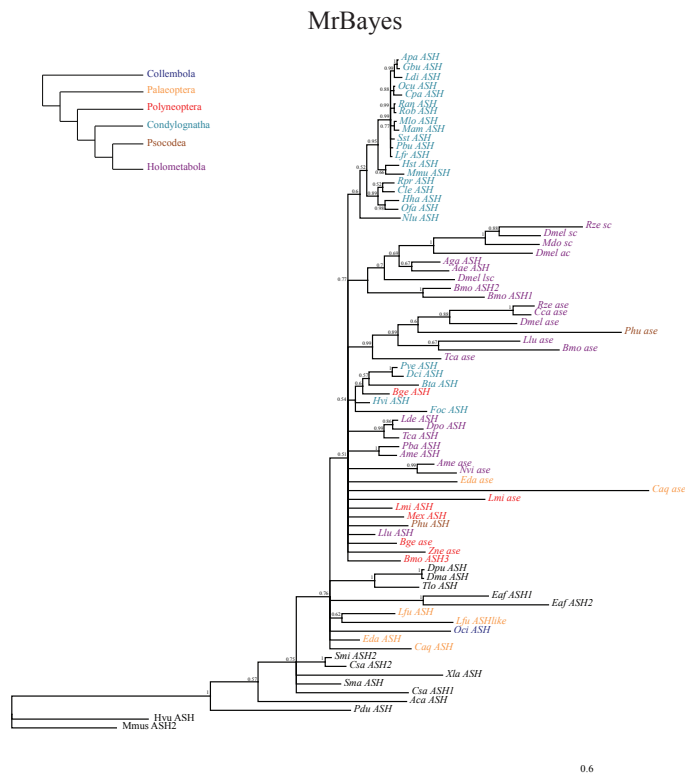

**Figure S3.** Phylograms of the 77-taxon analyses. RAxML Maximum-likelihood analyses and MrBayes Bayesian analyses were conducted under the LG+ $\Gamma$  model and the GTR+ $\Gamma$  model, respectively. Support values obtained after 100 bootstrap replicates and Bayesian posterior probabilities are shown for all branches. Scale bar indicates number of changes per site.

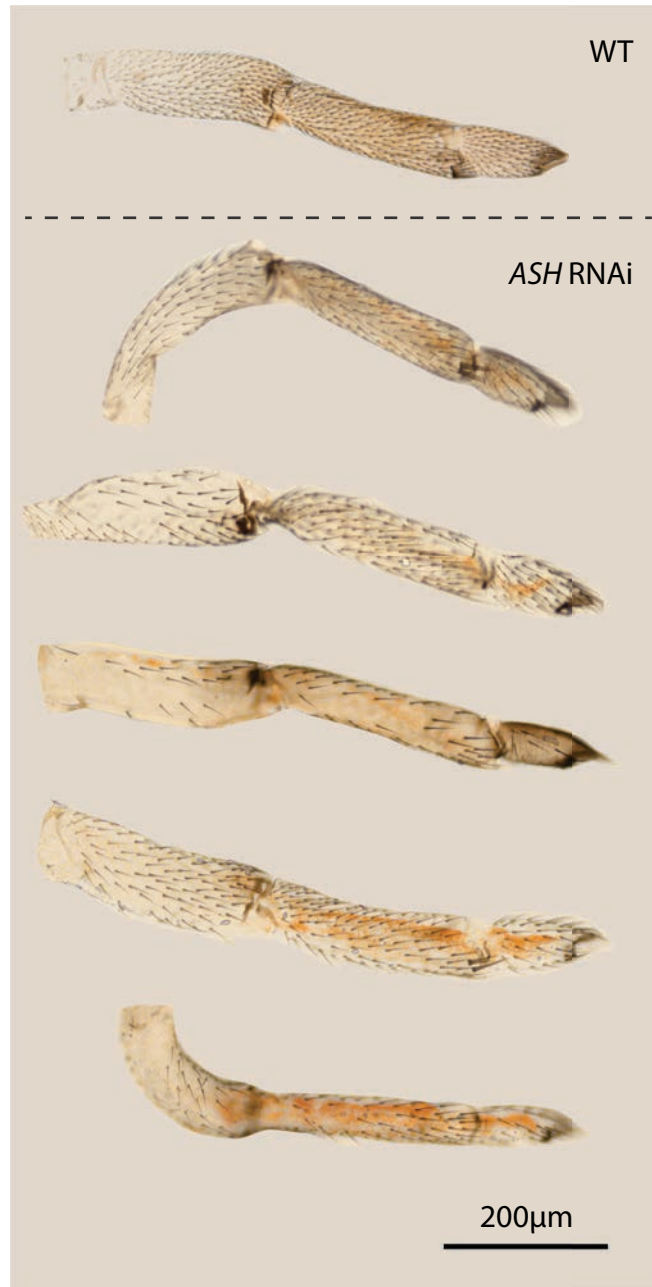

**Figure S4.** Variability in penetrance of *ASH* RNAi in *G. buenoi*. Top panel: wild-type leg L1; bottom panel: phenotypic variation in *dsASH* among five treated individuals.

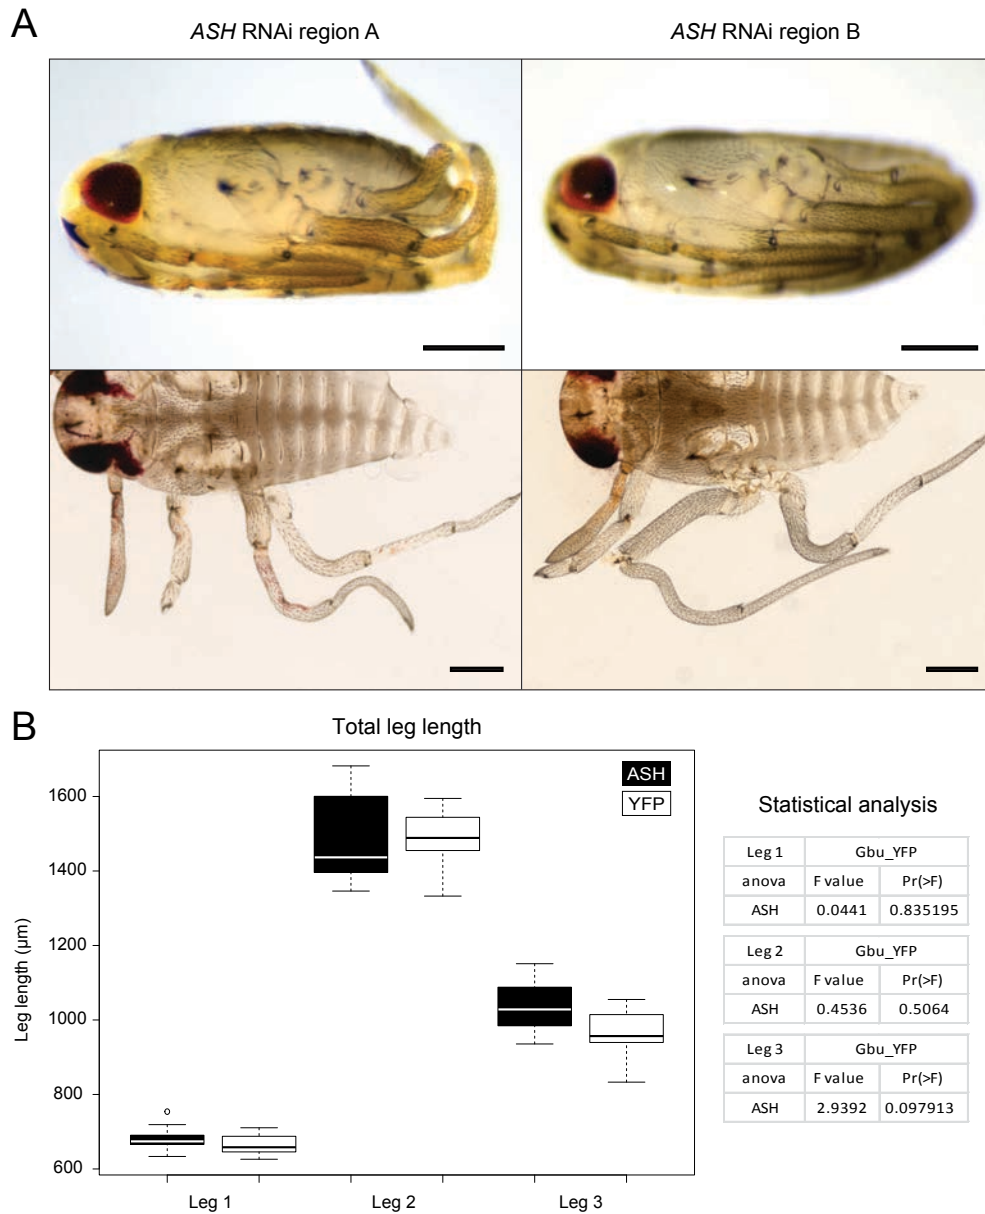

**Figure S5.** Phenotypic characterization of *ASH* RNAi individuals in *G. buenoi*. (A) The two non-overlapping subregions A and B targeted by RNAi show phenotypes similar to those obtained when the full *ASH* coding region is targeted. (B) The total leg length is not affected in *ASH* RNAi individuals (full construct).

| Gene                           | Species                         | Accession                   | Gene     | Species                        | Accession                      |                             |          |
|--------------------------------|---------------------------------|-----------------------------|----------|--------------------------------|--------------------------------|-----------------------------|----------|
| Antp                           | <i>Limnogonus franciscanus</i>  | LT986725                    | cyt b    | <i>Limnogonus franciscanus</i> | LT986731                       |                             |          |
|                                | <i>Metrobates hesperius</i>     | LT986723                    |          | <i>Mesovelvia mulsanti</i>     | LT986733                       |                             |          |
|                                | <i>Aquarius paludum</i>         | LT989878                    |          | <i>Metrobates hesperius</i>    | LT986732                       |                             |          |
|                                | <i>Cylindrostethus palmaris</i> | LT989880                    |          | DII                            | <i>Limnogonus franciscanus</i> | LT986710                    |          |
|                                | <i>Gerris buenoi</i>            | LT986682                    |          |                                | <i>Metrobates hesperius</i>    | LT986709                    |          |
|                                | <i>Hydrometra stagnorum</i>     | LT989889                    |          | GILT                           | <i>Limnogonus franciscanus</i> | LT986712                    |          |
|                                | <i>Limnogonus franciscanus</i>  | LT989890                    |          |                                | <i>Metrobates hesperius</i>    | LT986713                    |          |
|                                | <i>Limnoporus dissortis</i>     | LT989891                    |          |                                | <i>Limnogonus franciscanus</i> | LT986741                    |          |
|                                | ASH                             | <i>Mesovelvia mulsanti</i>  |          | LT986683                       | ND1                            | <i>Mesovelvia mulsanti</i>  | LT986743 |
|                                |                                 | <i>Microvelia americana</i> |          | LT986679                       |                                | <i>Metrobates hesperius</i> | LT986742 |
| <i>Microvelia longipes</i>     |                                 | LT989879                    | Scr      | <i>Limnogonus franciscanus</i> | LT986706                       |                             |          |
| <i>Oiovelia cunucunumana</i>   |                                 | LT989892                    |          | <i>Metrobates hesperius</i>    | LT986707                       |                             |          |
| <i>Paravelia bullialata</i>    |                                 | LT989881                    | Ubx      | <i>Limnogonus franciscanus</i> | LT986704                       |                             |          |
| <i>Rhagovelia antilleana</i>   |                                 | LT989893                    |          | <i>Metrobates hesperius</i>    | LT986705                       |                             |          |
| <i>Rhagovelia obesa</i>        |                                 | LT989882                    | 12S rRNA | <i>Limnogonus franciscanus</i> | LT990042                       |                             |          |
| <i>Stridulivelia strigosa</i>  |                                 | LT989894                    |          | <i>Mesovelvia mulsanti</i>     | LT990044                       |                             |          |
| <i>Limnogonus franciscanus</i> |                                 | LT986734                    |          | <i>Metrobates hesperius</i>    | LT990043                       |                             |          |
| COI                            |                                 | <i>Metrobates hesperius</i> | LT986735 | <i>Limnogonus franciscanus</i> | LT990048                       |                             |          |
|                                | <i>Limnogonus franciscanus</i>  | LT986739                    | 16S rRNA | <i>Mesovelvia mulsanti</i>     | LT990041                       |                             |          |
| COII                           | <i>Metrobates hesperius</i>     | LT986740                    |          | <i>Metrobates hesperius</i>    | LT990040                       |                             |          |
|                                | <i>Limnogonus franciscanus</i>  | LT989872                    | 18S rRNA | <i>Limnogonus franciscanus</i> | LT989869                       |                             |          |
| <i>Mesovelvia mulsanti</i>     | LT989874                        | <i>Metrobates hesperius</i> |          | LT989870                       |                                |                             |          |
| COIII                          | <i>Metrobates hesperius</i>     | LT989873                    | 28S rRNA | <i>Limnogonus franciscanus</i> | LT989871                       |                             |          |
|                                | <i>Oncopeltus fasciatus</i>     | LT989875                    |          |                                |                                |                             |          |

**Table S1.** Accession numbers of genes markers selected for phylogenetic analyses. \*: 5,000 Insect Genome Project (i5k).

| species                     | primer name     | sequence 5'-3'                                             |
|-----------------------------|-----------------|------------------------------------------------------------|
| <i>Gerris buenoi</i>        | Gbu-ASH-Fwd     | AGCCAGAACATGGTGACTCAAAGG                                   |
|                             | Gbu-ASH-Rev     | TGCTGCCACCATGAGATAACGTCGA                                  |
|                             | Gbu-ASH-Fwd1    | CGAAGTTCGGCGTCCAAGAAATTG                                   |
|                             | Gbu-ASH-Rev1    | TGCCGTCGAAGCTCCTAAAG                                       |
|                             | Gbu-ASH-Fwd-T7  | <b>TAATACGACTCACTATAGGGAGACCACAGCCAGAACATGGTGACTCAAAGG</b> |
|                             | Gbu-ASH-Rev-T7  | <b>TAATACGACTCACTATAGGGAGACCCTGCTGCCACCATGAGATAACGTCGA</b> |
|                             | Gbu-ASH-Fwd1-T7 | <b>TAATACGACTCACTATAGGGAGACCACCGAAGTTCGGCGTCCAAGAAATTG</b> |
|                             | Gbu-ASH-Rev1-T7 | <b>TAATACGACTCACTATAGGGAGACCCTGCCGTCGAAGCTCCTAAAG</b>      |
|                             | Mmu-ASH-Fwd     | CGACGCGATGACGTCGGTTGTAGG                                   |
|                             | Mmu-ASH-Rev     | TGCTGCCACCACGATATAACATCAA                                  |
| <i>Mesovelia mulsanti</i>   | Mmu-ASH-Fwd-T7  | <b>TAATACGACTCACTATAGGGAGACCCTGCTGCCACCACGATATAACATCAA</b> |
|                             | Mmu-ASH-Rev-T7  | <b>TAATACGACTCACTATAGGGAGACCACCGACGCGATGACGTCGGTTGTAGG</b> |
|                             | Mam-ASH-Fwd     | GGTCATAAAATGGTGACACAAAGA                                   |
| <i>Microvelia americana</i> | Mam-ASH-Rev     | TGTTGCCACCATGATATAACATCTA                                  |
|                             | Mam-ASH-Fwd-T7  | <b>TAATACGACTCACTATAGGGAGACCACGGTCATAAAATGGTGACACAAAGA</b> |
|                             | Mam-ASH-Rev-T7  | <b>TAATACGACTCACTATAGGGAGACCCTGTTGCCACCATGATATAACATCTA</b> |

**Table S2.** List of PCR primers used in this study.



| taxonomic group                | Species name                      | abbreviation                | ASH ortholog(s) | asense ortholog |   |
|--------------------------------|-----------------------------------|-----------------------------|-----------------|-----------------|---|
| Collembola                     | <i>Orchesella cincta</i>          | <i>Oci</i>                  | 1               | ?               |   |
|                                | <i>Catajapyx aquilonaris</i>      | <i>Caq</i>                  | 1               | 1               |   |
| Palaeoptera                    | <i>Ephemera danica</i>            | <i>Eda</i>                  | 1               | 1               |   |
|                                | <i>Ladona fulva</i>               | <i>Lfu</i>                  | 1               | ?               |   |
|                                | <i>Blattella germanica</i>        | <i>Bgi</i>                  | 1               | 1               |   |
| Polyneoptera                   | <i>Locusta migratoria</i>         | <i>Lmi</i>                  | ?               | 2               |   |
|                                | <i>Medauroidea extradentata</i>   | <i>Mex</i>                  | 1               | ?               |   |
|                                | <i>Zootermopsis nevadensis</i>    | <i>Zne</i>                  | ?               | 1               |   |
|                                | <i>Bemisia tabaci</i>             | <i>Bta</i>                  | 1               | 0               |   |
|                                | <i>Cimex lectularius</i>          | <i>Cle</i>                  | 1               | 0               |   |
|                                | <i>Frankliniella occidentalis</i> | <i>Foc</i>                  | 1               | 0               |   |
|                                | <i>Halyomorpha halys</i>          | <i>Hha</i>                  | 1               | 0               |   |
|                                | <i>Nilaparvata lugens</i>         | <i>Nlu</i>                  | 1               | 0               |   |
|                                | <i>Oncopeltus fasciatus</i>       | <i>Ofa</i>                  | 1               | 0               |   |
|                                | <i>Rhodnius prolixus</i>          | <i>Rpr</i>                  | 1               | 0               |   |
|                                | <i>Aquarius paladum</i>           | <i>Apa</i>                  | 1               | 0               |   |
|                                | <i>Cylindrostethus palmaris</i>   | <i>Cpa</i>                  | 1               | 0               |   |
|                                | <i>Gerris buenoi</i>              | <i>Gbu</i>                  | 1               | 0               |   |
|                                | Condylognatha                     | <i>Hydrometra stagnorum</i> | <i>Hst</i>      | 1               | 0 |
| <i>Limnogonus franciscanus</i> |                                   | <i>Lfr</i>                  | 1               | 0               |   |
| <i>Limnopus dissortis</i>      |                                   | <i>Ldi</i>                  | 1               | 0               |   |
| <i>Mesovelia mulsanti</i>      |                                   | <i>Mmu</i>                  | 1               | 0               |   |
| <i>Microvelia americana</i>    |                                   | <i>Mam</i>                  | 1               | 0               |   |
| <i>Microvelia longipes</i>     |                                   | <i>Mlo</i>                  | 1               | 0               |   |
| <i>Oiovelia cunucunumana</i>   |                                   | <i>Ocu</i>                  | 1               | 0               |   |
| <i>Paravelia bullialata</i>    |                                   | <i>Pbu</i>                  | 1               | 0               |   |
| <i>Rhagovelia antilleana</i>   |                                   | <i>Ran</i>                  | 1               | 0               |   |
| <i>Rhagovelia obesa</i>        |                                   | <i>Rob</i>                  | 1               | 0               |   |
| <i>Stridulivelia strigosa</i>  |                                   | <i>Sst</i>                  | 1               | 0               |   |
| Psocodea                       |                                   | <i>Pediculus humanus</i>    | <i>Phu</i>      | 1               | 1 |
|                                |                                   | <i>Aedes aegypti</i>        | <i>Aae</i>      | 2               | 1 |
|                                |                                   | <i>Anopheles gambiae</i>    | <i>Aga</i>      | 1               | 1 |
|                                | <i>Apis mellifera</i>             | <i>Ame</i>                  | 1               | 1               |   |
|                                | <i>Bombyx mori</i>                | <i>Bmo</i>                  | 3               | 1               |   |
|                                | <i>Ceratitis capitata</i>         | <i>Cca</i>                  | 2               | 1               |   |
|                                | <i>Dendroctonus ponderosae</i>    | <i>Dpo</i>                  | 1               | 1               |   |
|                                | <i>Drosophila melanogaster</i>    | <i>Dme</i>                  | 3               | 1               |   |
| Holometabola                   | <i>Leptinotarsa decemlineata</i>  | <i>Lde</i>                  | 1               | 1               |   |
|                                | <i>Limnephilus lunatus</i>        | <i>Llu</i>                  | ?               | 1               |   |
|                                | <i>Musca domestica</i>            | <i>Mdo</i>                  | 3               | 1               |   |
|                                | <i>Nasonia vitripennis</i>        | <i>Nvi</i>                  | 1               | 1               |   |
|                                | <i>Pogonomyrmex barbatus</i>      | <i>Pba</i>                  | 1               | 1               |   |
|                                | <i>Rhagoletis zephyria</i>        | <i>Rze</i>                  | 3               | 1               |   |
|                                | <i>Tribolium castaneum</i>        | <i>Tca</i>                  | 1               | 1               |   |

**Table S3.** Presence/absence of *ASH* and *asense* orthologs in the species investigated in this study.
